# Supplementary material
Source: publisher figshare collection journal article supplement (https://frontiersin.figshare.com/ndownloader/files/24575333)
Supplement: Supplementary file 1 [file 24575333]

VOPO4·2H2O: Large-Scale Synthesis and Zinc-Ion Storage Application

Supplementary Material

Xianghua Zhang1, Dan Yang1, Weiling Liu2, Xianhong Rui1*

1School of Materials and Energy, Guangdong University of Technology, Guangzhou 510006

2School of Materials Science and Engineering, Nanyang Technological University, Singapore, 639798

*** Correspondence:**Corresponding Author
xhrui@gdut.edu.cn (X. Rui)


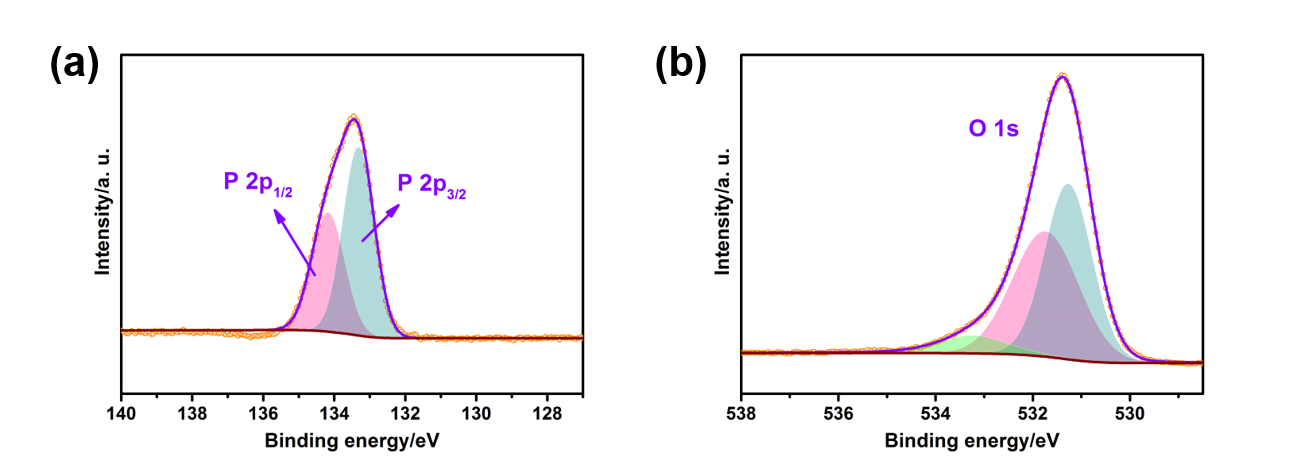


**Supplementary Figure 1.** The high-resolution XPS spectra of P2p and O1s in the VOPO4·2H2O sample.


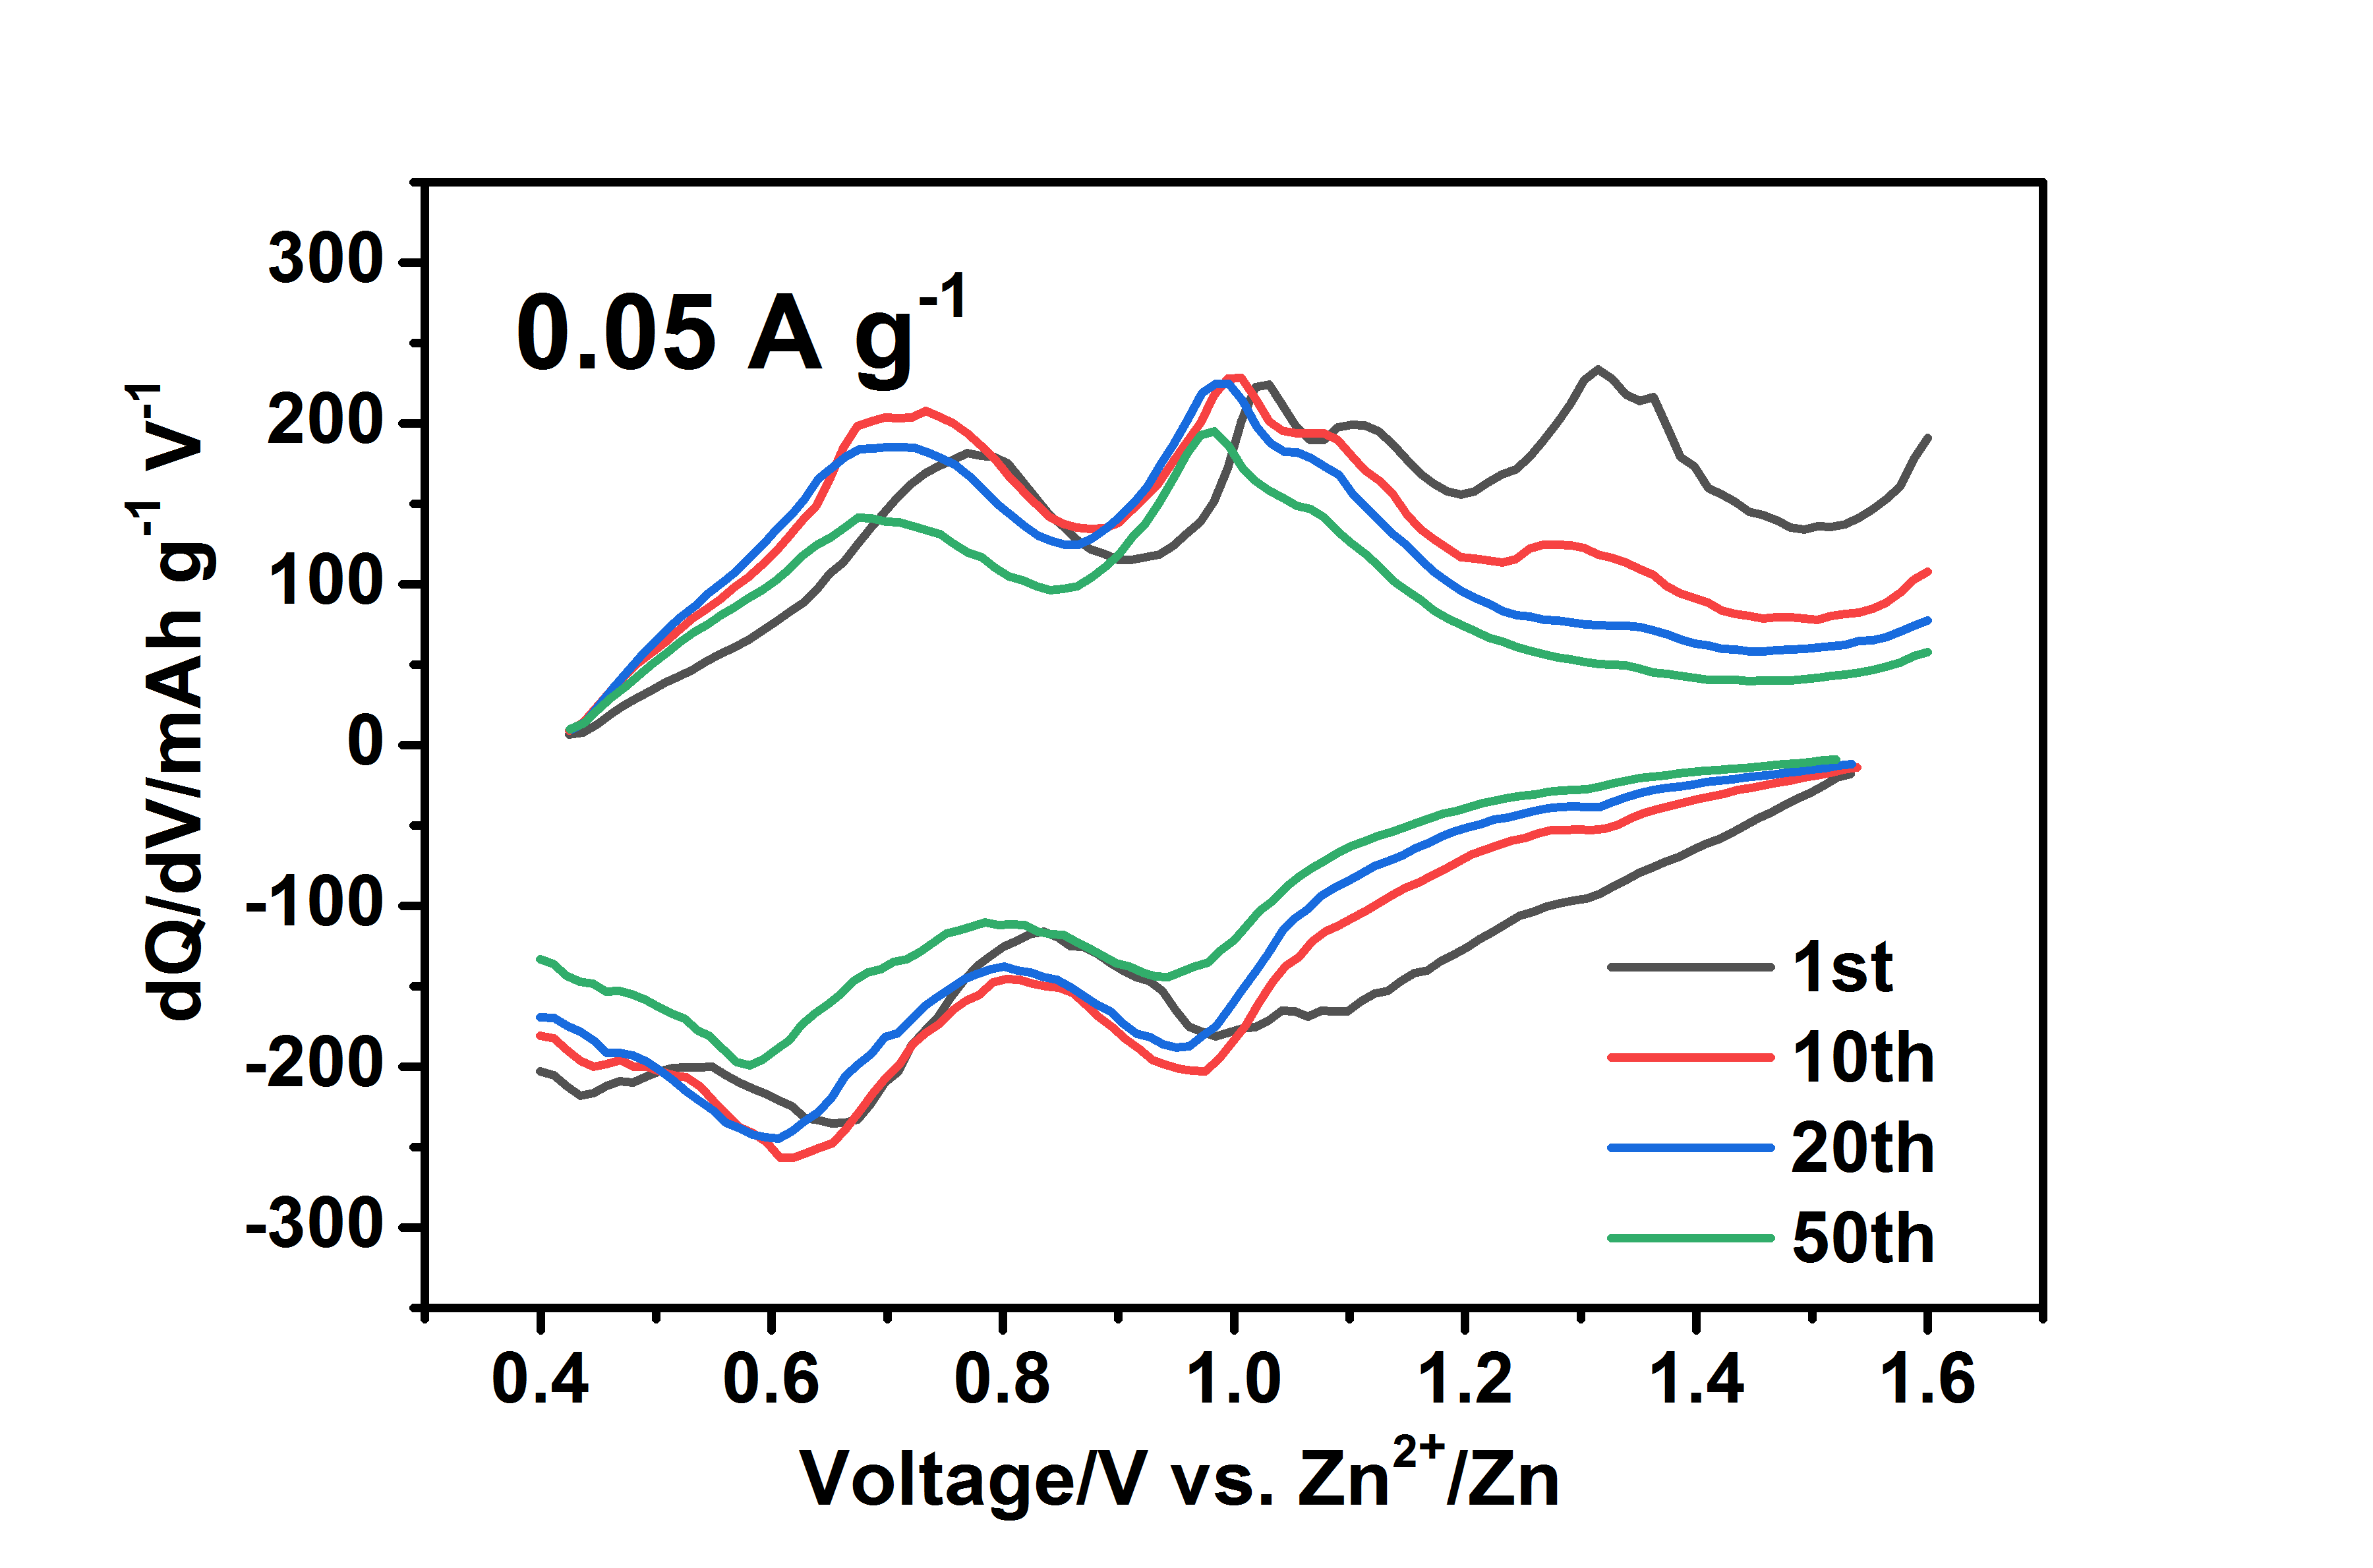


**Supplementary Figure 2.** The associated differential capacity curves of the VOPO4·2H2O sample at low current density of 0.05 A g-1.


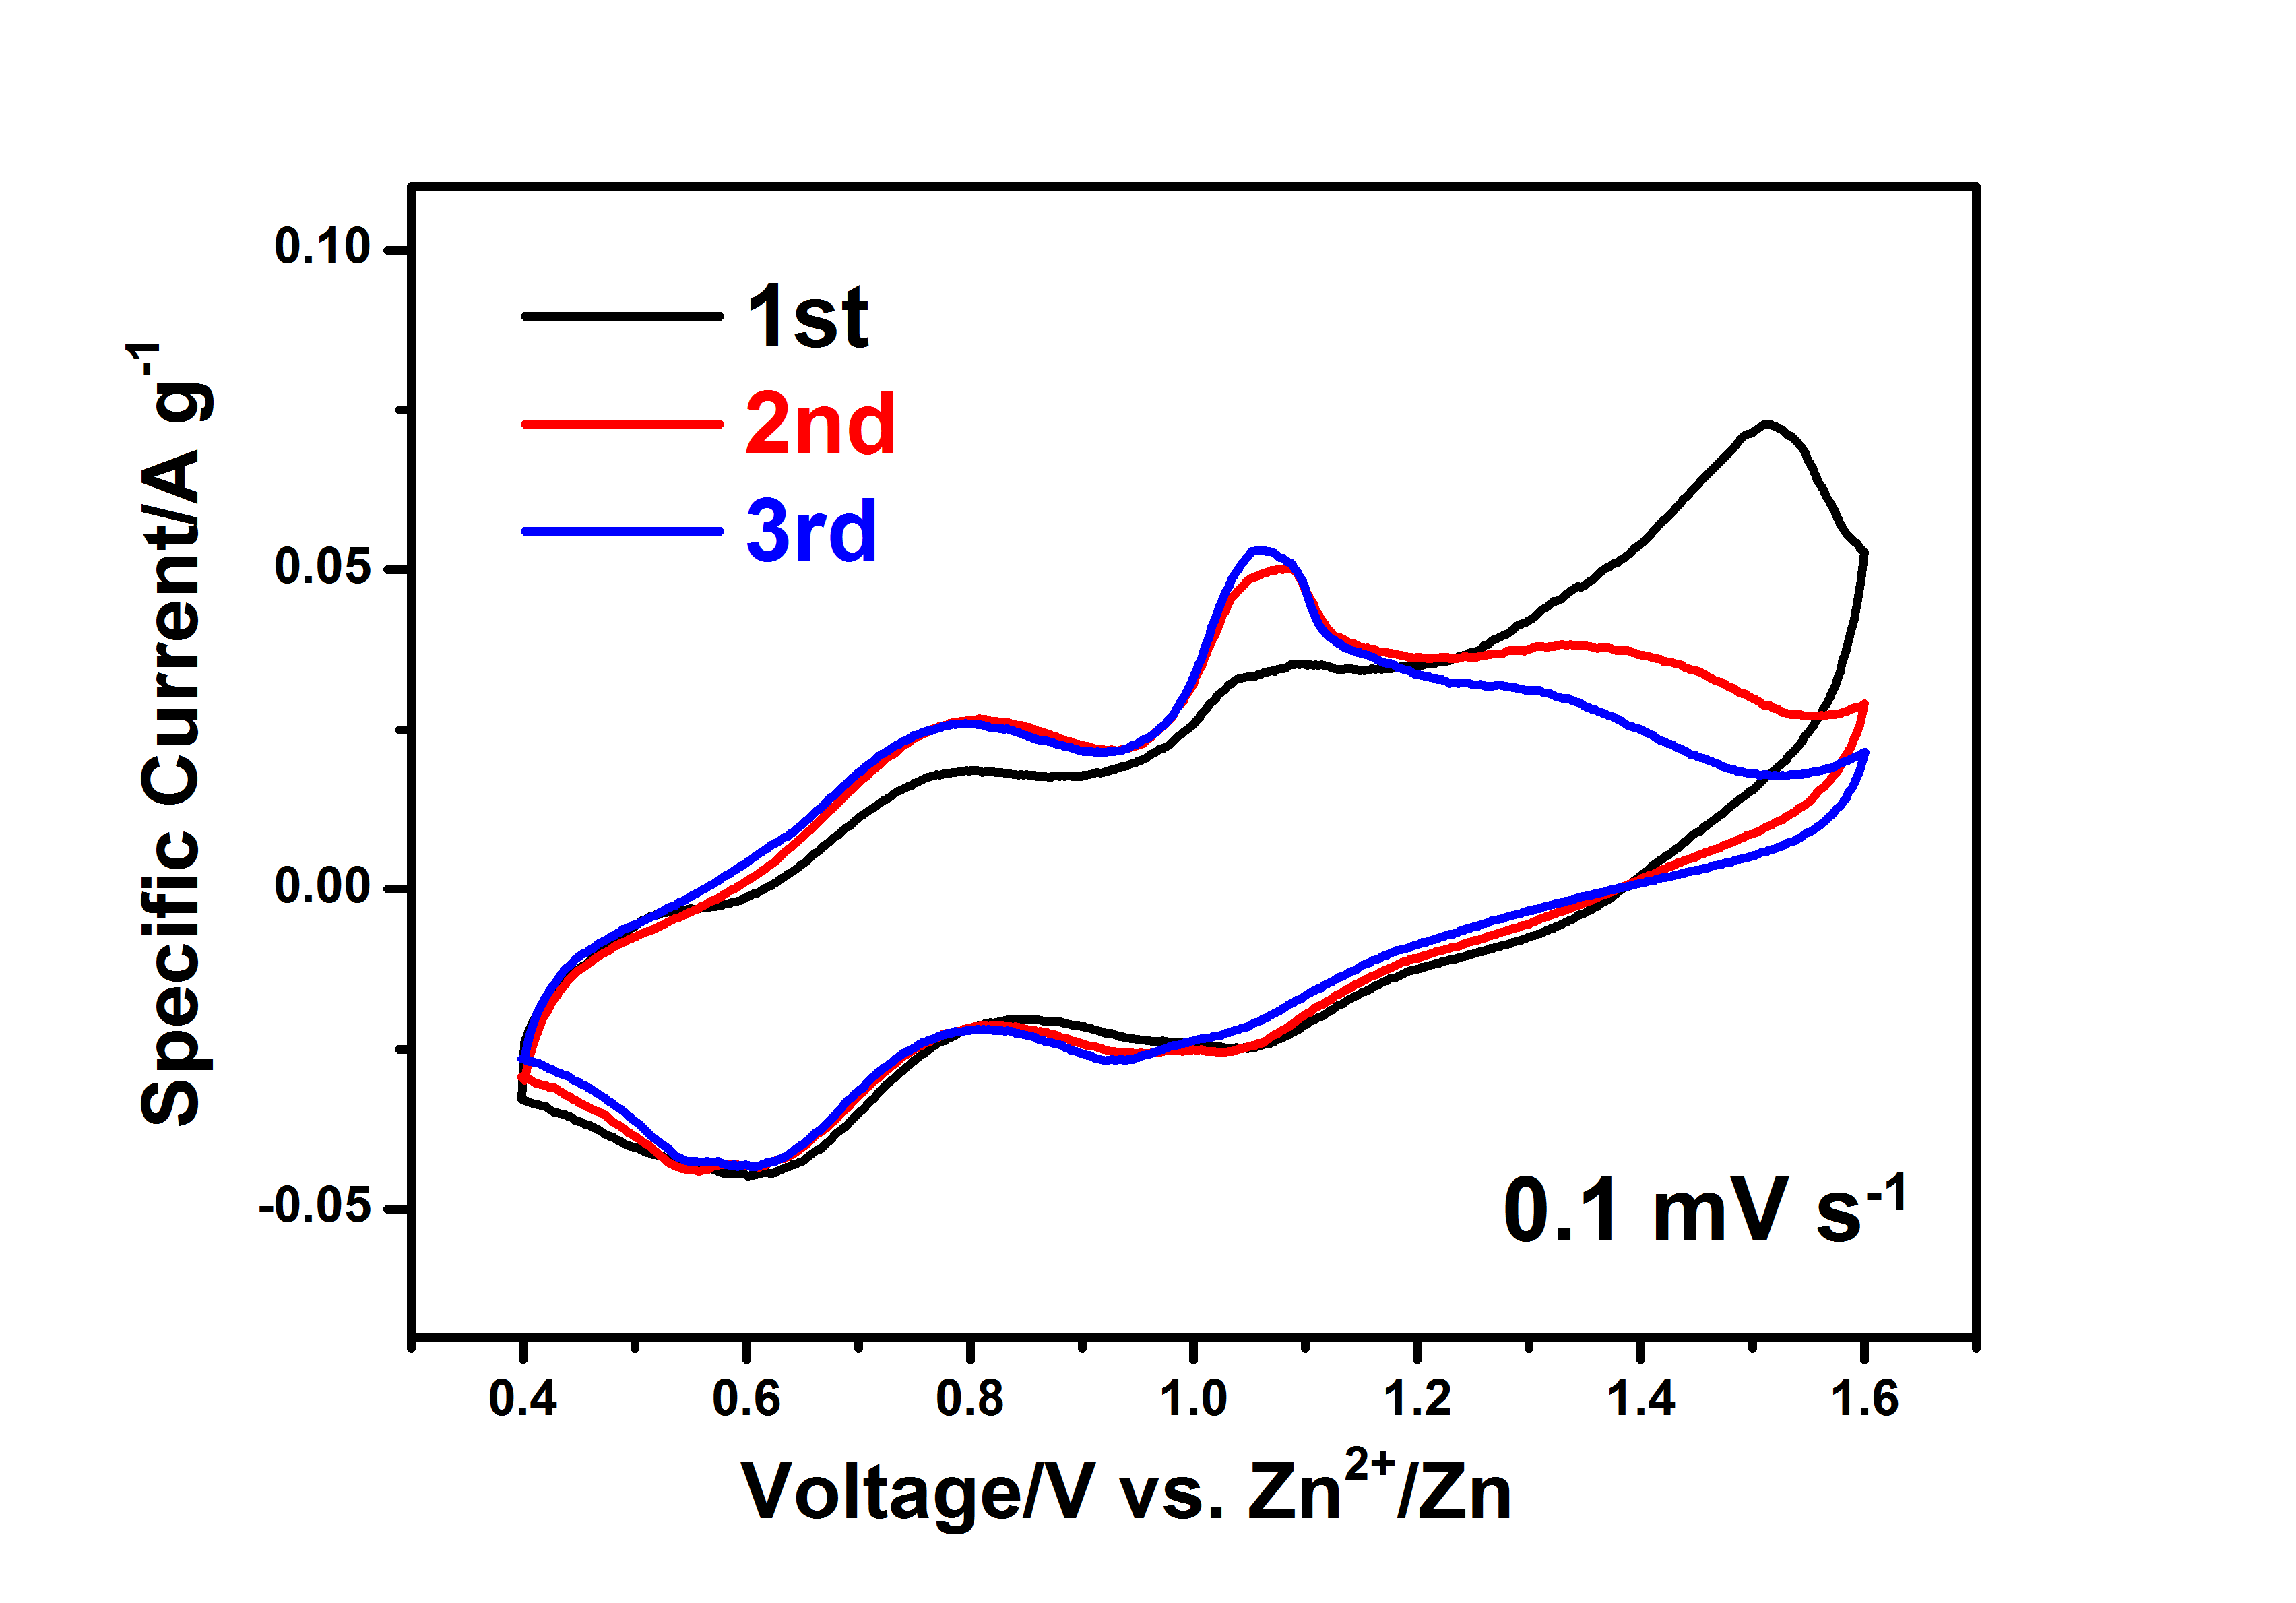


**Supplementary Figure 3.** The CV curves of the VOPO4·2H2O sample at a scan rate of 0.1 mV s-1.


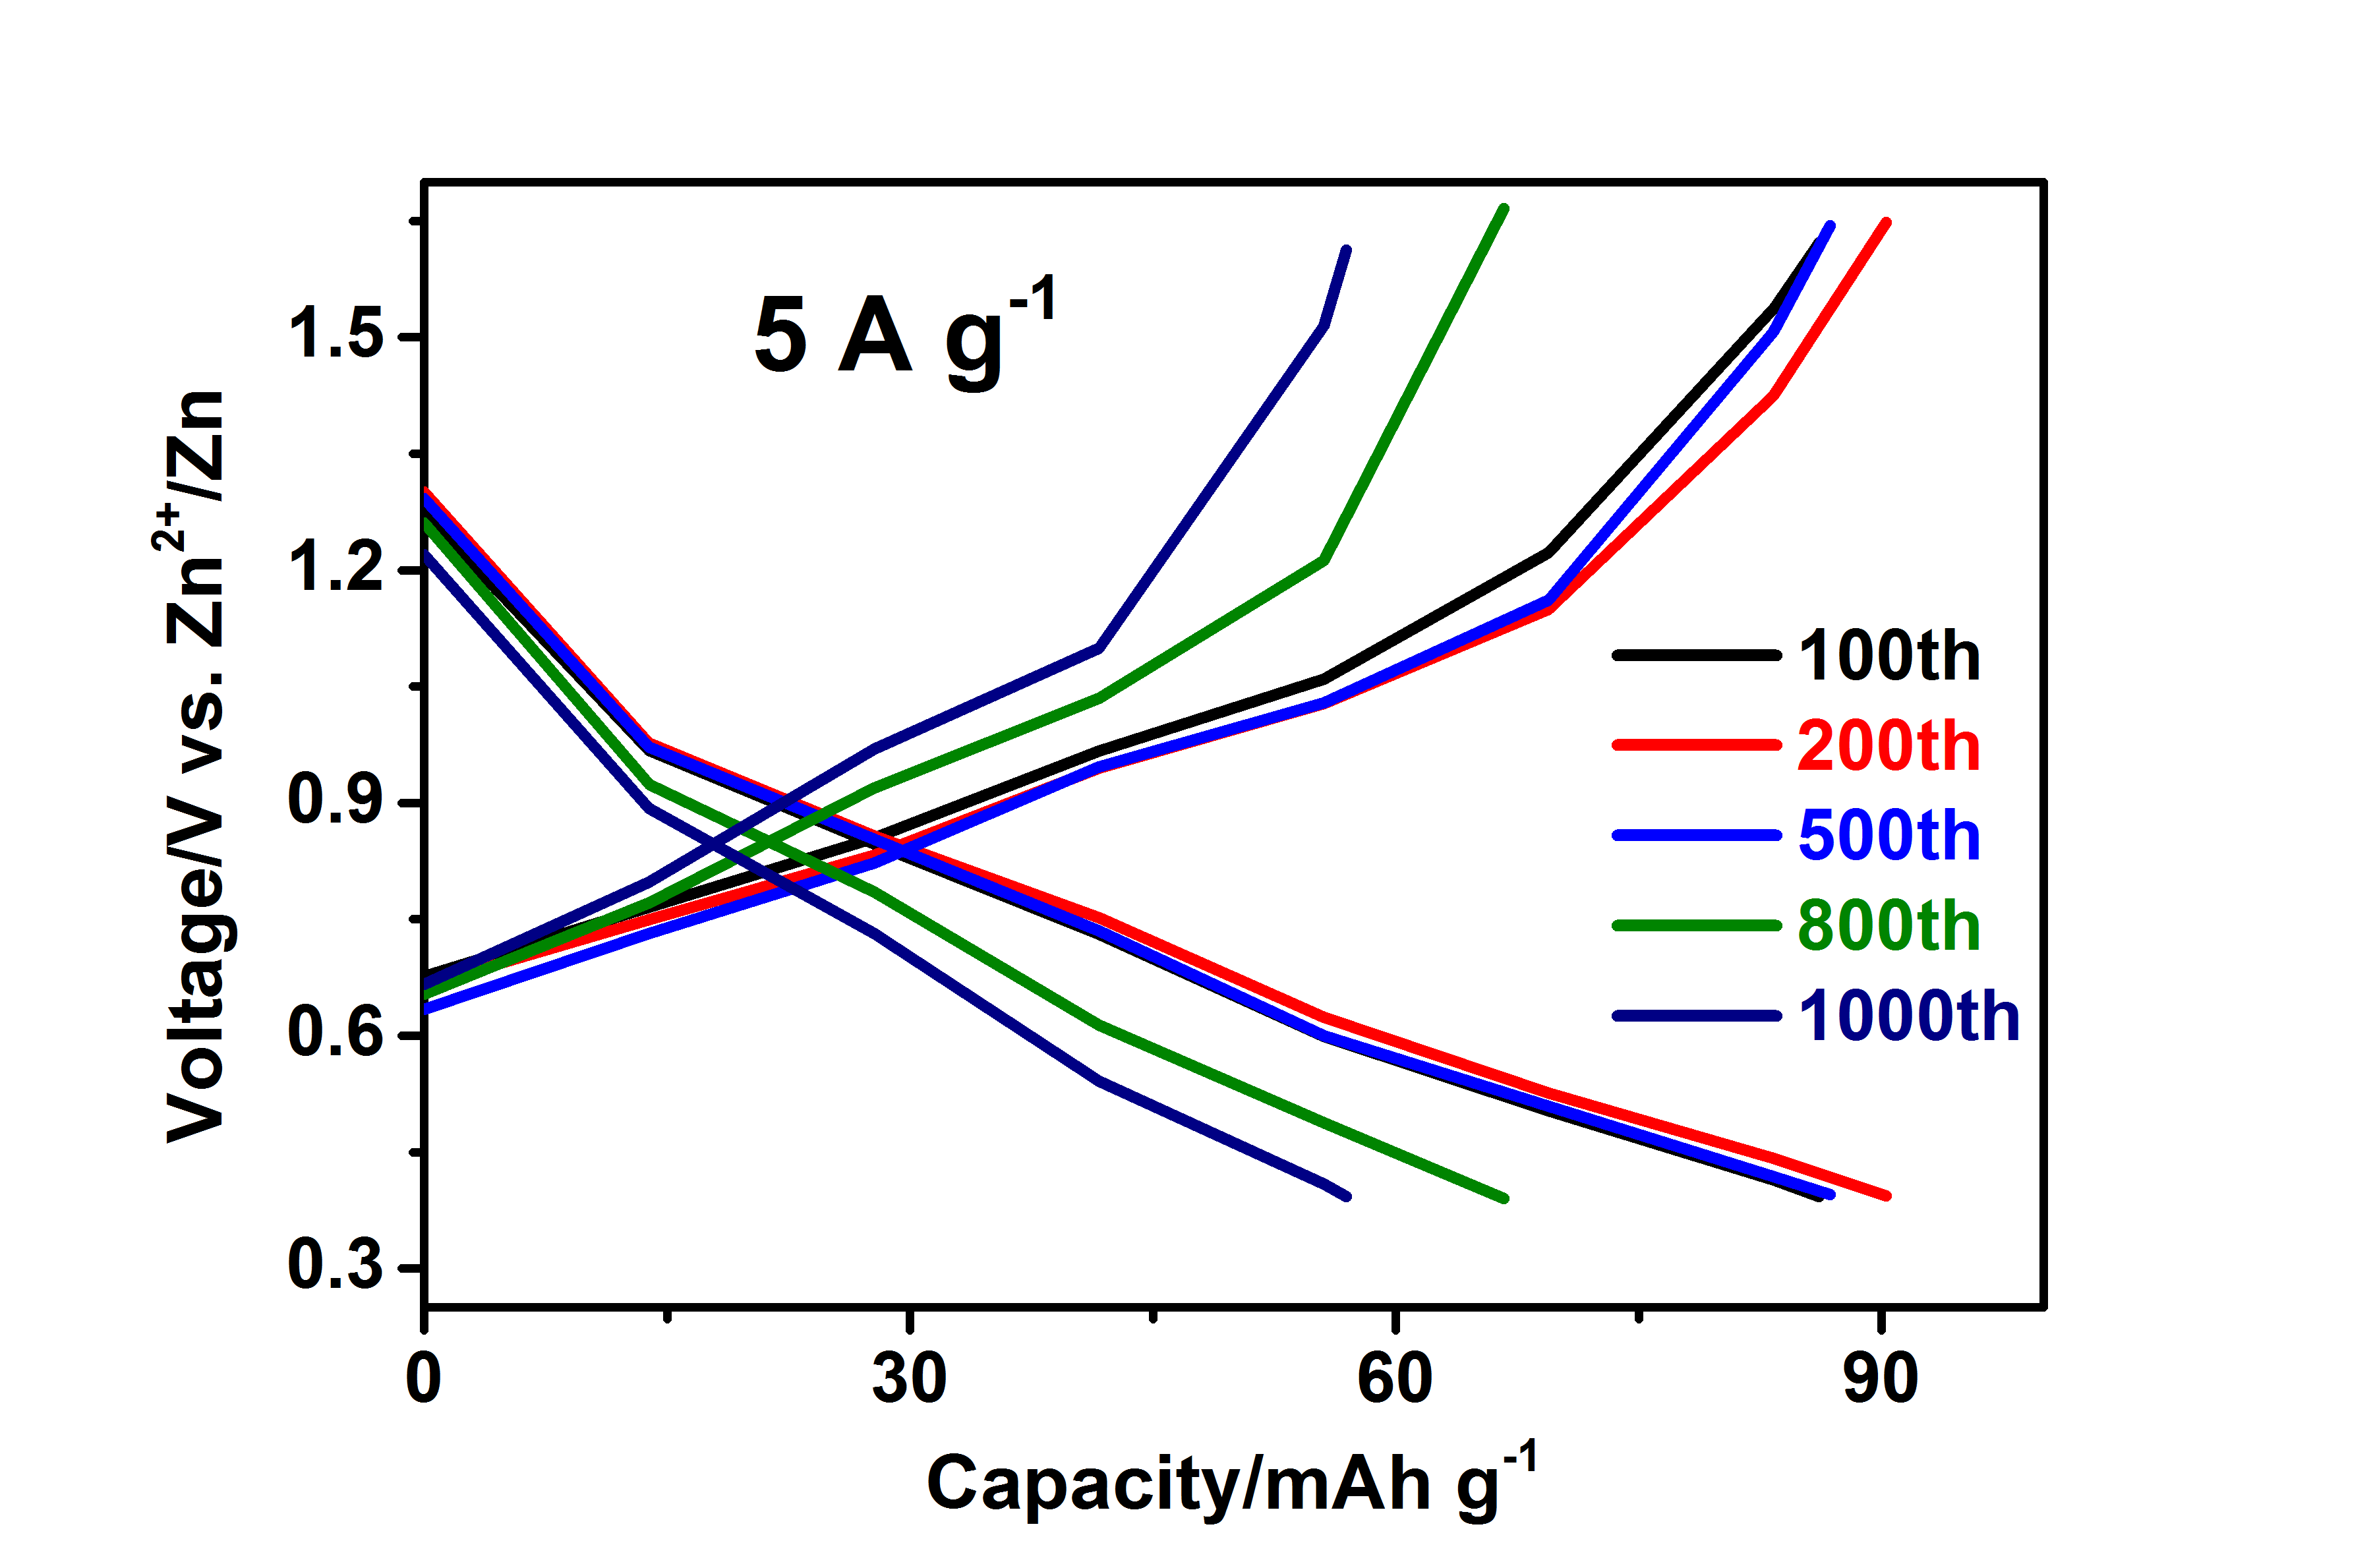


**Supplementary Figure 4.** The galvanostatic charge-discharge curves of the VOPO4·2H2O sample at high current density of 5 A g-1.
